# Supplementary material for: Adult-Onset Vitelliform Macular Dystrophy caused by BEST1 p.Ile38Ser Mutation is a Mild Form of Best Vitelliform Macular Dystrophy
Source: PubMed Central journal article supplement (PMC5567297; doi:10.1038/s41598-017-09629-9), 2017-08-22
Supplement: 41598_2017_9629_MOESM1_ESM.pdf [file 41598_2017_9629_MOESM1_ESM.pdf]

**Adult-Onset Vitelliform Macular Dystrophy caused by BEST1 p.Ile38Ser Mutation is a Mild Form of Best Vitelliform Macular Dystrophy**

Ikhyun Jun<sup>1,2,3</sup>, Joon Suk Lee<sup>3</sup>, Ji Hwan Lee<sup>1</sup>, Christopher Seungkyu Lee<sup>1</sup>, Seung-il Choi<sup>2</sup>, Heon Yung Gee<sup>3</sup>, Min Goo Lee<sup>3</sup>, Eung Kweon Kim<sup>1,2,4,\*</sup>

<sup>1</sup>The Institute of Vision Research, Department of Ophthalmology, Yonsei University College of Medicine, Seoul, Korea

<sup>2</sup>Corneal Dystrophy Research Institute, Yonsei University College of Medicine, Seoul, Korea

<sup>3</sup>Department of Pharmacology and Brain Korea 21 PLUS Project for Medical Sciences, Yonsei University College of Medicine, Seoul, Korea

<sup>4</sup>Severance Biomedical Science Institute, Yonsei University College of Medicine, Seoul, Korea

**Supplementary Table S1.** Detected nonsynonymous variants of *PRPH2*, *IMPG1*, and *IMPG2* in the subject.

| Gene         | Nucleotide change <sup>a</sup> | Amino acid change | Frequencies in the dbSNP database <sup>b</sup> | Frequencies in the ExAC database <sup>c</sup> |
|--------------|--------------------------------|-------------------|------------------------------------------------|-----------------------------------------------|
| <i>PRPH2</i> | c.910C>G                       | p.Gln304Glu       | rs390659<br>(MAF:G=0.2434/1219)                | 94370/121392<br>(36804 hom)                   |
|              | c.929G>A                       | p.Arg310Lys       | rs425876<br>(MAF:C=0.0587/294)                 | 110687/121410<br>(50607 hom)                  |
|              | c.1013A>G                      | p.Asp338Gly       | rs434102<br>(MAF:T=0.2426/1215)                | 94027/120706<br>(36719 hom)                   |
| <i>IMPG1</i> | c.1552C>G                      | p.His518Asp       | rs3734311<br>(MAF:G=0.4651/2329)               | 56217/120658<br>(13556 hom)                   |
|              | c.2377G>A                      | p.Asp793Asn       | rs76604824<br>(MAF:T=0.0463/232)               | 1433/38120<br>(39 hom)                        |
| <i>IMPG2</i> | c.2021C>T                      | p.Thr674Ile       | rs571391<br>(MAF:G=0.3508/1757)                | 78869/121034<br>(25908 hom)                   |

<sup>a</sup>cDNA mutations are numbered according to human cDNA reference sequence NM\_000322 (*PRPH2*), NM\_001563 (*IMPG1*), and NM\_016247 (*IMPG2*); +1 corresponds to the A of ATG translation initiation codon. <sup>b</sup>dbSNP database (<http://www.ncbi.nlm.nih.gov/SNP>). <sup>c</sup>ExAC browser (<http://exac.broadinstitute.org/>).

**Supplementary Table S2. Conductance values of variants, and summary of analysis of variance (ANOVA) followed by Newman-Keuls multiple comparison test of Figure 5E.**

| <b>Conductance</b>                           | <b>G<sub>chord</sub> (nS, mean ± SEM)</b> |                |
|----------------------------------------------|-------------------------------------------|----------------|
| Mock                                         | 0.45 ± 0.10                               |                |
| WT                                           | 25.25 ± 2.08                              |                |
| p.Ile38Ser                                   | 5.20 ± 0.86                               |                |
| p.Ala195Val                                  | 1.78 ± 0.53                               |                |
| p.Trp93Cys                                   | 0.78 ± 0.19                               |                |
| WT + p.Ile38Ser                              | 10.65 ± 1.80                              |                |
| WT + p.Ala195Val                             | 19.46 ± 1.99                              |                |
| WT + p.Trp93Cys                              | 2.97 ± 0.46                               |                |
| <b>Newman-Keuls Multiple Comparison Test</b> | <b>P &lt; 0.05?</b>                       | <b>Summary</b> |
| Mock vs WT                                   | Yes                                       | ***            |
| Mock vs WT + p.Ala195Val                     | Yes                                       | ***            |
| Mock vs WT + p.Ile38Ser                      | Yes                                       | **             |
| Mock vs p.Ile38Ser                           | No                                        | ns             |
| Mock vs WT + p.Trp93Cys                      | No                                        | ns             |
| Mock vs p.Ala195Val                          | No                                        | ns             |
| Mock vs p.Trp93Cys                           | No                                        | ns             |
| p.Trp93Cys vs WT                             | Yes                                       | ***            |
| p.Trp93Cys vs WT + p.Ala195Val               | Yes                                       | ***            |
| p.Trp93Cys vs WT+ p.Ile38Ser                 | Yes                                       | **             |
| p.Trp93Cys vs p.Ile38Ser                     | No                                        | ns             |
| p.Trp93Cys vs WT+ p.Trp93Cys                 | No                                        | ns             |
| p.Trp93Cys vs p.Ala195Val                    | No                                        | ns             |
| p.Ala195Val vs WT                            | Yes                                       | ***            |
| p.Ala195Val vs WT+ p.Ala195Val               | Yes                                       | ***            |
| p.Ala195Val vs WT+ p.Ile38Ser                | Yes                                       | **             |
| p.Ala195Val vs p.Ile38Ser                    | No                                        | ns             |
| p.Ala195Val vs WT+ p.Trp93Cys                | No                                        | ns             |
| WT+ p.Trp93Cys vs WT                         | Yes                                       | ***            |
| WT+ p.Trp93Cys vs WT+ p.Ala195Val            | Yes                                       | ***            |
| WT+ p.Trp93Cys vs WT+ p.Ile38Ser             | Yes                                       | **             |
| WT+ p.Trp93Cys vs p.Ile38Ser                 | No                                        | ns             |
| p.Ile38Ser vs WT                             | Yes                                       | ***            |
| p.Ile38Ser vs WT+ p.Ala195Val                | Yes                                       | ***            |
| p.Ile38Ser vs WT+ p.Ile38Ser                 | Yes                                       | **             |
| WT+ p.Ile38Ser vs WT                         | Yes                                       | ***            |
| WT+ p.Ile38Ser vs WT+ p.Ala195Val            | Yes                                       | ***            |
| WT+ p.Ala195Val vs WT                        | Yes                                       | **             |

Abbreviations are as follows: SEM, standard error; ns, not significant; WT, wild type; \*,  $P < 0.05$ ; \*\*,  $P < 0.01$ ; \*\*\*,  $P < 0.001$ .

**Supplementary Table S3. Primer Designed for Amplification of *PRPH2*, *IMPG1*, and *IMPG2*.**

| Gene      | Exon no.                   | Sequence (5'.....3')             |
|-----------|----------------------------|----------------------------------|
| PRPH2     | Exon 1A F                  | AGGGCTTCCATCTGGCATACTTG          |
|           | Exon 1A R                  | CTATCCCCTGCTCAAGCTGTGATTC        |
|           | Exon 1B F                  | AAGTTGTGCACCCGATGGAGA            |
|           | Exon 1B R                  | CAGCCTAGGACTGTTCCCTGAAGATTG      |
|           | Exon 2 F                   | CCCACAGCTCCACTGAAGGC             |
|           | Exon 2 R                   | CCAAGTGTGCGAGTGAATGACTATTCT      |
|           | Exon 3 F                   | TCAGGGAGAGTCTCTGTAAGATGGT        |
|           | Exon 3 R                   | CAGGTGTGTTGAGCACTGAGGAC          |
| IMPG1     | Exon 1 F                   | TGTTGAATTTCCGGTGGATAAATGGA       |
|           | Exon 1 R                   | TCCAGAAACAGACACTGCTACATGTTT      |
|           | Exon 2 F                   | GCTAAAGACAACCTATGGATGAATGA       |
|           | Exon 2 R                   | GCTTGATCGGCTCATTATACTATTCTC      |
|           | Exon 3 F                   | GCCTAATCAGATACCTCCAAGCA          |
|           | Exon 3 R                   | TGTGTGACATAAGCCATGAAATAA         |
|           | Exon 4 F                   | CACAGCTCTTAGTGGCTGACAT           |
|           | Exon 4 R                   | TGCAAATAATATGGTACAGTCAGGTTGA     |
|           | Exon 5 F                   | ACATGCTATCATGATGATTTGAATGAAAGTTG |
|           | Exon 5 R                   | GGTCAATCTAGTTTTAAAGTATGCTTTTCT   |
|           | Exon 6 F                   | CCCTCAGTACCTAGGAAGAAGTGAGAA      |
|           | Exon 6 R                   | AACACATACAGGGAAGCACCAA           |
|           | Exon 7 F                   | TGGAACTGTTCCGCCGTAAGGG           |
|           | Exon 7 R                   | GCTTCAAAGGTGGCCCAA               |
|           | Exon 8 F                   | TCCAGGATTTGGCAGAGCTAAACA         |
|           | Exon 8 R                   | AGGAACAAAGAGTTTGGCCTCCTT         |
|           | Exon 9 F                   | AAAAGTAATGGGCTTATCCAAGACAT       |
|           | Exon 9 R                   | CAGTAAGAGCTGAGAAATCCATTTACA      |
|           | Exon 10 F                  | TTCCTGTCACAGTAATGATCGACTT        |
|           | Exon 10 R                  | TTCTCTCCGAGCCATCAGGAA            |
|           | Exon 11 F                  | TGGGTTAAGCAAGTGCTGCTTGT          |
|           | Exon 11 R                  | CCAGCCTGCTTGGTCCAAATC            |
|           | Exon 12 F                  | TGGGTTCCGGATGGCTTTGT             |
|           | Exon 12 R                  | GGCAGATTCAGTTATCCGAGAAGCA        |
|           | Exon 13A F                 | GGGCAATGGTCATAGAAGTAGTGGTG       |
|           | Exon 13A R                 | TGAAATGATCTACGCAAATGCTATGT       |
|           | Exon 13B F                 | ATGTCTTCAGCAACAGCTGGCTT          |
|           | Exon 13B R                 | CCCCACCAGTGATTATTCTGCAA          |
|           | Exon 14 F                  | AATGATGTGCTCCATAGCTTCCAAA        |
|           | Exon 14 R                  | GGGACTAATCACTGCAAATCAACCA        |
|           | Exon 15 F                  | TGGGTTGAAAGGACCATATGAATTT        |
|           | Exon 15 R                  | TGGAGCTAAACTAATATCACTTGTGTC      |
| Exon 16 F | ATGTCACCCCCTTAAACAGTAAATT  |                                  |
| Exon 16 R | TTTCAGCAACCACAACCTCAGAACTT |                                  |
| Exon 17 F | AAATTTTCAGGGAAGGTGGAAGCA   |                                  |
| Exon 17 R | AGAAGATGTCATAAATGGCAAGCA   |                                  |
| IMPG2     | Exon 1 F                   | TCCATTTCTTACAGCAATCACATCA        |
|           | Exon 1 R                   | TTCTTAGTGGACTGCTTGTTAAAGG        |
|           | Exon 2 F                   | AGTAGAAAGGTAGTTTTGGCTCAGT        |
|           | Exon 2 R                   | CCTATGATTTGGGCACTGGCTTCT         |
|           | Exon 3 F                   | TTTTGCTTCCTTTAGGCCTTAGC          |
|           | Exon 3 R                   | GAGACACTCCAGCTCATGAAGAGAT        |
|           | Exon 4 F                   | CTTATCCACAGGCCTGGTCATT           |
|           | Exon 4 R                   | TTTGATTCTAAATCCATGGCAGGTT        |
|           | Exon 5 F                   | AAAATGTACTTGTGTTGTGAGCCTGTCT     |
|           | Exon 5 R                   | GCAATATTGTGCTAGAGGACTAAGG        |
|           | Exon 6 F                   | TGTAGTCCAGCAATGGGAGATAA          |
|           | Exon 6 R                   | CTCTCTGGTAGAGGAGTTACTTCTTTT      |

|            |                             |
|------------|-----------------------------|
| Exon 7 F   | TAACCACTCCAGGAACCAAGTAG     |
| Exon 7 R   | GCCTGTGTCTTAAAGTCTACCCAAT   |
| Exon 8 F   | CCTACGTAACCTTGTGAGCAGCAA    |
| Exon 8 R   | TTTTCTTTCATTTTCTGACCTGGGTAT |
| Exon 9 F   | GGCAGAATTGAGTAGTTGCAACAGAGA |
| Exon 9 R   | GCCAACAACCTGGAGTCCTCTGC     |
| Exon 10 F  | TATCAGGTTGGCTCCTGTCTCAT     |
| Exon 10 R  | AGTGATGGAATCCATGCTCTTTGAG   |
| Exon 11 F  | GTAATGGTCTAGGGATGATGCAAGA   |
| Exon 11 R  | CGCTTCATAGGAATCTTGAACAGA    |
| Exon 12 F  | TCATAGCCATAGTCTCTTCCTCTCT   |
| Exon 12 R  | ATTATTAATACACCGCCTCCTTGTC   |
| Exon 13A F | AAGCCACGGCTTGGACAGTG        |
| Exon 13A R | TGAGTGACTGTCCCATATTGCAAACA  |
| Exon 13B F | AGGGTTAGAGACGCAGATTTCAG     |
| Exon 13B R | GTTCACTCAACCTGTGCCAAA       |
| Exon 13C F | TCATCCTCTAGCAGGGTGGAGATT    |
| Exon 13C R | AGCACTCAAATATGAACATGATGACA  |
| Exon 13D F | TTTCTTACCAACCCTAGGCCATGA    |
| Exon 13D R | GAGAAATTGTCCAGAGACATATTGGCA |
| Exon 14 F  | ATGTTTGGACGATGTTTTGAAAAGG   |
| Exon 14 R  | TAGGAAAAGTGAGGCAGGGTCTTAC   |
| Exon 15 F  | AAATTATAGGTGCAGGCCCTTTTC    |
| Exon 15 R  | GGTTTTATGATTTGGCTCTGAGTTG   |
| Exon 16 F  | GCATCTTATTCTTAGTGCTACTTCTGT |
| Exon 16 R  | AGCTTCACGTGGTCAGCATTTAT     |
| Exon 17 F  | ACACTCATACACACCCCAACC       |
| Exon 17 R  | GCCATGGGTGTGAGGAAATCATAA    |
| Exon 18 F  | TGTGCTCACTCAGGTGTGACATTA    |
| Exon 18 R  | CTCCTAGTCTATGATATGCACAGAGT  |
| Exon 19 F  | ATTCCCTTACTAAGCCAGACTTCTCCA |
| Exon 19 R  | GCACAGAACAGAACAACCTTCCTTCA  |

---

**Supplementary Figure S1.**

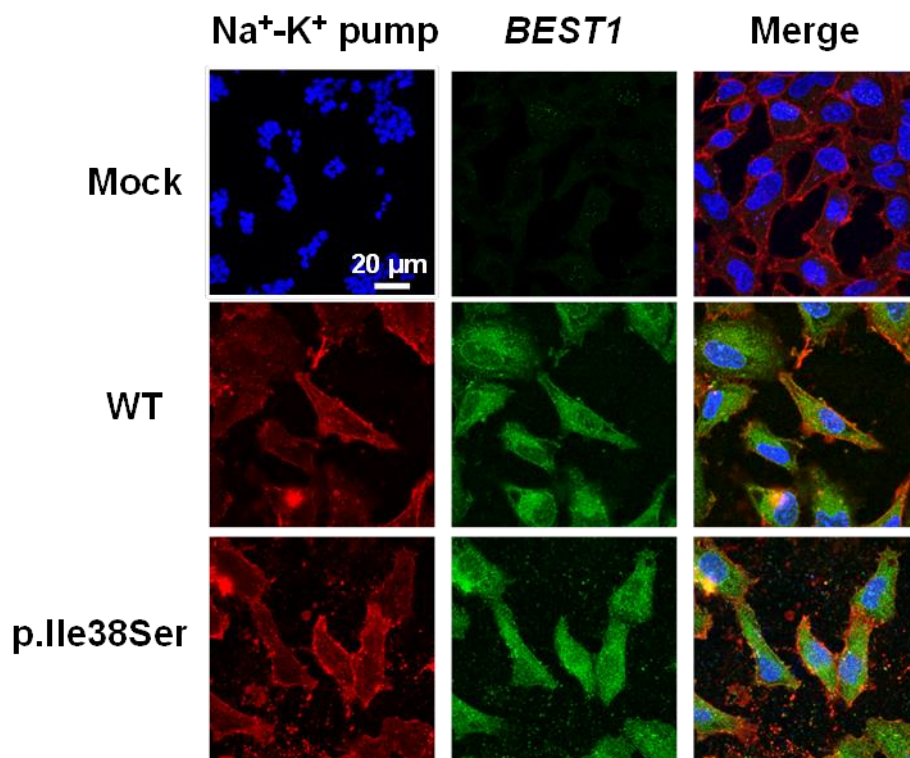

**Supplementary Figure S1.** Immunocytochemistry of hBEST1 wild type and p.Ile38Ser mutant. HeLa cells were transfected with plasmids expressing wild type and p.Ile38Ser hBestrophin-1. hBEST1 (Green) was co-stained with the plasma membrane marker protein Na<sup>+</sup>-K<sup>+</sup> pump (Red) and nucleus marker DAPI (Blue). Surface expression of wild type and mutant hBEST1 was confirmed by immunocytochemistry.

**Supplementary Figure S2.**

**Fig. 3a – uncropped western blots**

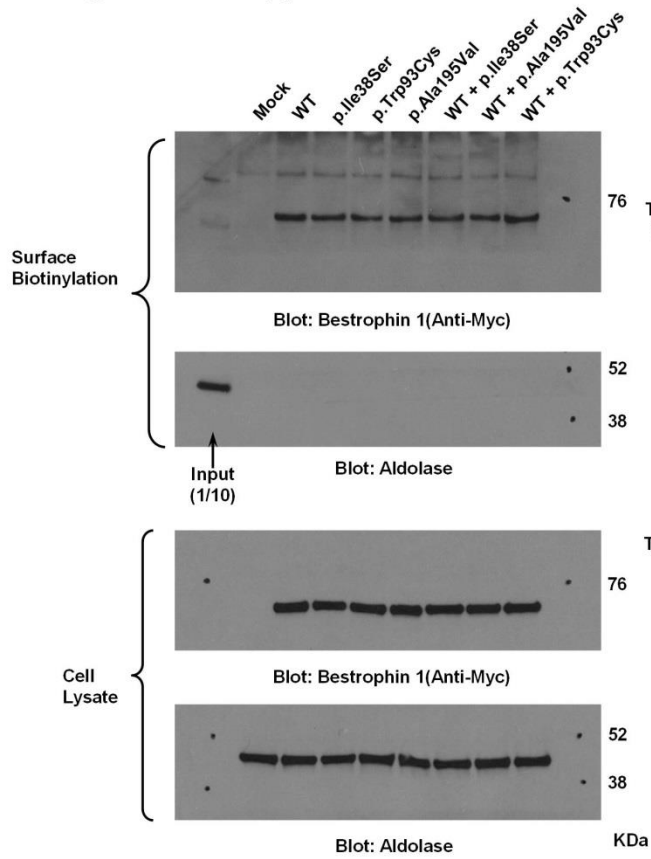

**Fig. 3c – uncropped western blots**

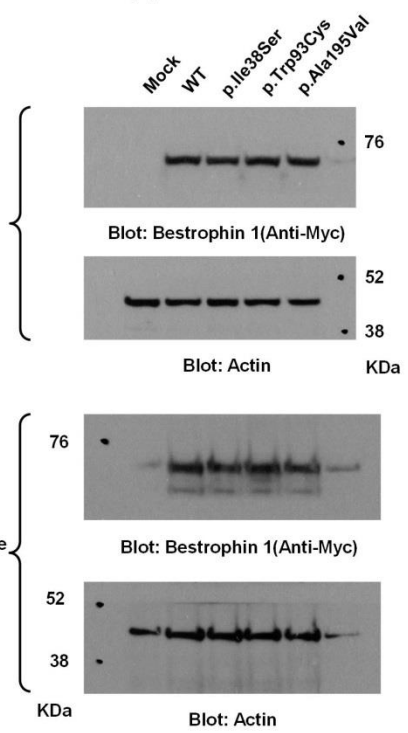

**Supplementary Figure S2.** Figure showing uncropped western blots from Fig. 3.

**Supplementary Figure S3.**

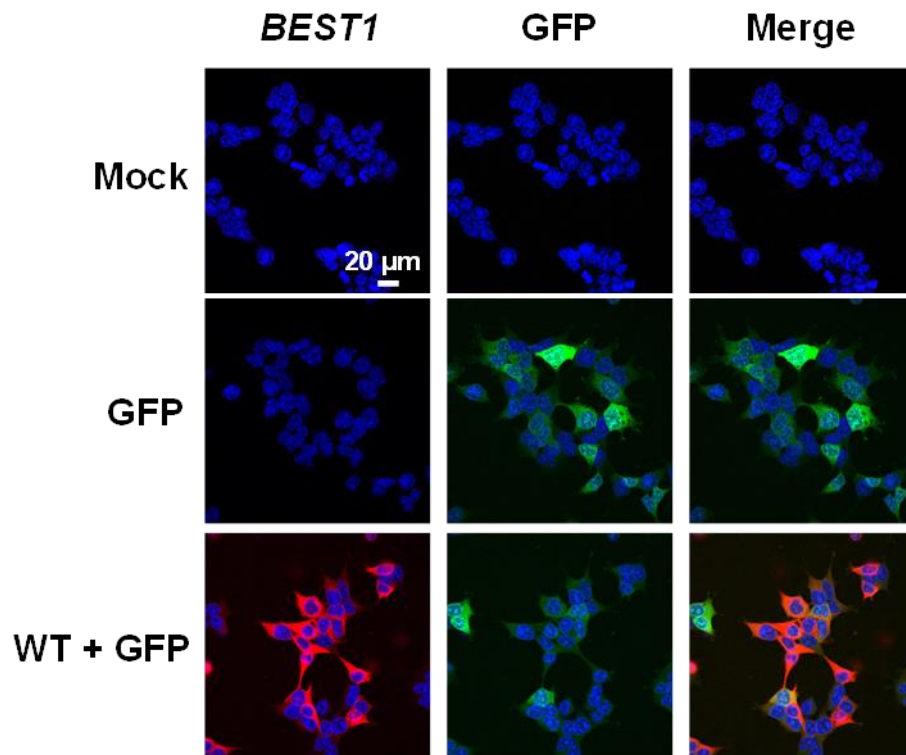

**Supplementary Figure S3.** Transfection efficiency of HEK293T cells which we used in the electrophysiological experiments. HEK293T cells were transfected with plasmids expressing green fluorescence protein (GFP), and wild type hBestrophin-1. hBEST1 (Red) was stained with nucleus marker DAPI (Blue). Average transfection rate over 90% was confirmed by immunocytochemistry.
